# Supplementary material for: Antiviral Immune Response as a Trigger of FUS Proteinopathy in Amyotrophic Lateral Sclerosis
Source: PubMed Central journal article supplement (PMC6941233; doi:10.1016/j.celrep.2019.11.094), 2019-12-24
Supplement: mmc1.pdf [file mmc1.pdf]

**Cell Reports, Volume 29**

**Supplemental Information**

**Antiviral Immune Response as a Trigger of FUS**

**Proteinopathy in Amyotrophic Lateral Sclerosis**

**Tatyana A. Shelkovernikova, Haiyan An, Lucy Skelt, John S. Tregoning, Ian R. Humphreys, and Vladimir L. Buchman**

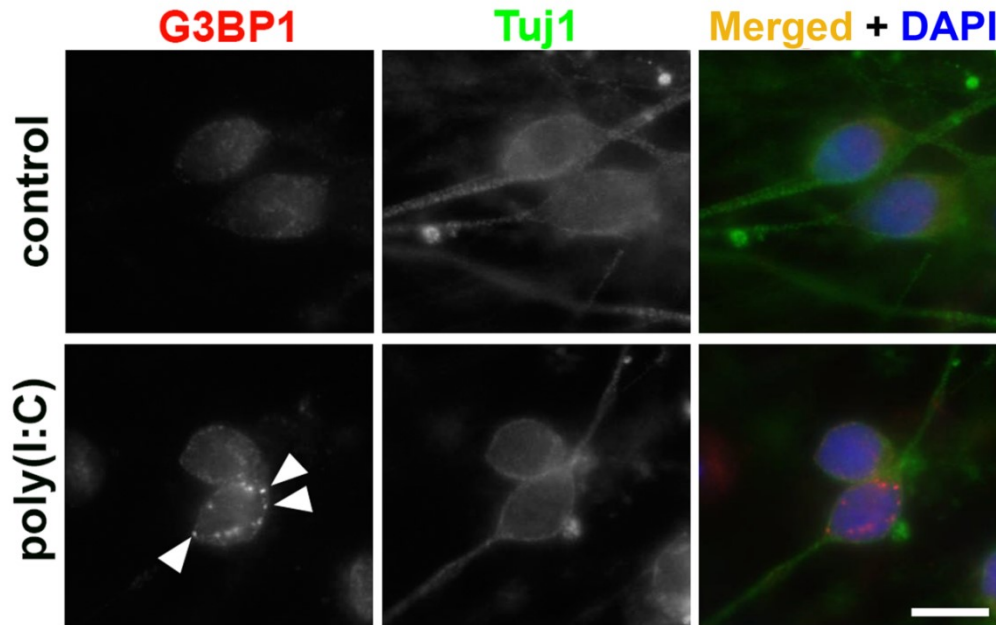

**Figure S1. Poly(I:C) transfection is capable of inducing SGs in human embryonic stem (ES) cell derived motor neurons, Related to Figure 1.**

DIV40 neurons were analysed 8 h post-transfection with poly(I:C). Arrowheads point to G3BP1-positive SGs. Scale bar, 10  $\mu$ m.

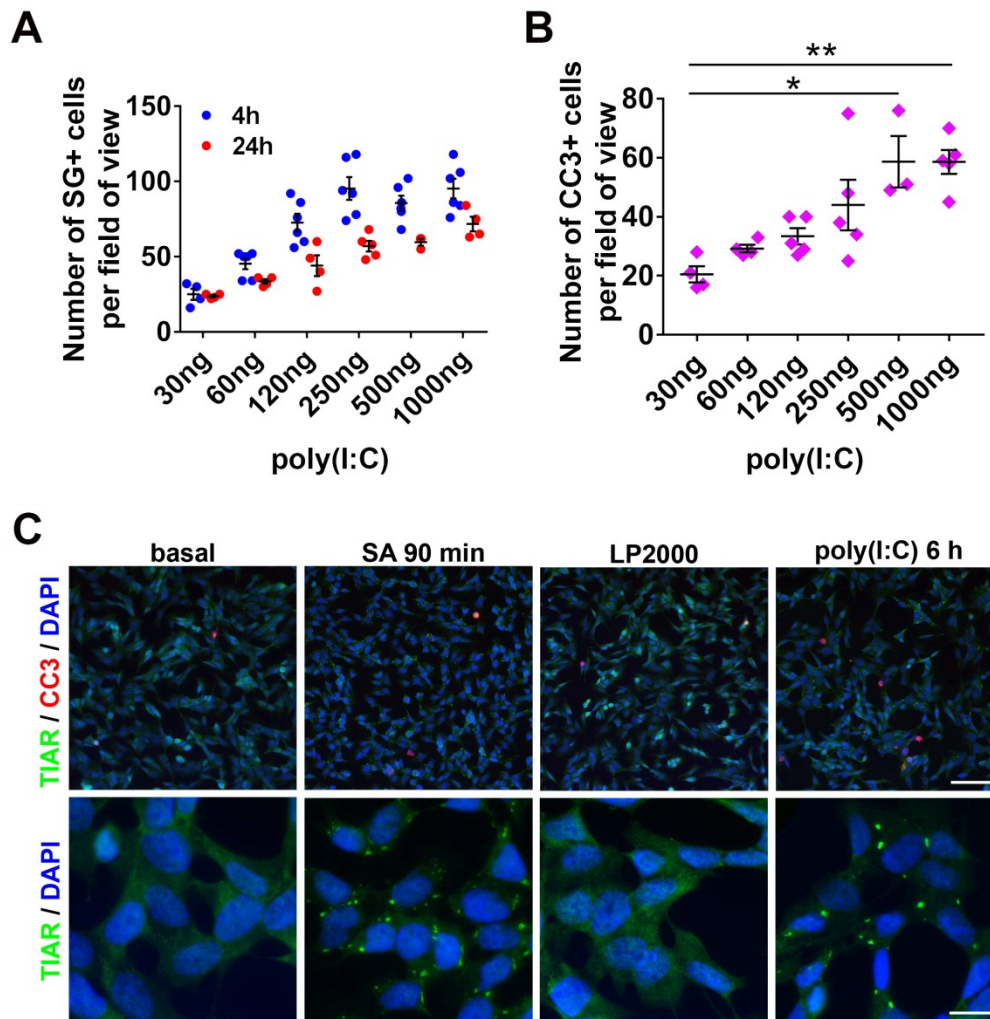

**Figure S2. Concentration-dependent ability of poly(I:C) to induce SGs and toxicity in SH-SY5Y cells, Related to Figure 1.**

(A) Concentration-dependent induction of SGs by poly(I:C) in SH-SY5Y cells. Cells were transfected with the corresponding amount of poly(I:C) (per well, in 24-well plates) and analysed 4 and 24 h post-transfection using anti-TIAR staining (x40 magnification). Data are represented as mean $\pm$ SEM.

(B) Concentration-dependent toxicity of poly(I:C) in SH-SY5Y cells. Cells were transfected with the corresponding amount of poly(I:C) (per well, in 24-well plates) and analysed 24 h post-transfection using anti-cleaved caspase 3 (CC3) staining (x20 magnification). Note that 250 ng was selected for all subsequent experiments due to the optimal balance between SG induction and cell survival. Data are represented as mean $\pm$ SEM. \* $p$ <0.05, \*\* $p$ <0.01 (Mann-Whitney  $U$  test).

(C) Poly(I:C) stimulation for 6 h and SA treatment for 1.5 h do not affect cell morphology and do not induce significant toxicity. SH-SY5Y cells were treated with SA or transfected with poly(I:C) and analysed after 1.5 h or 6 h, respectively, using a combination of anti-TIAR and cleaved caspase 3 (CC3) staining. Lipofectamine2000 (LP2000)-treated cells were included as a control for poly(I:C) transfection. Scale bars, general plane – 100  $\mu$ m, close up – 10  $\mu$ m.

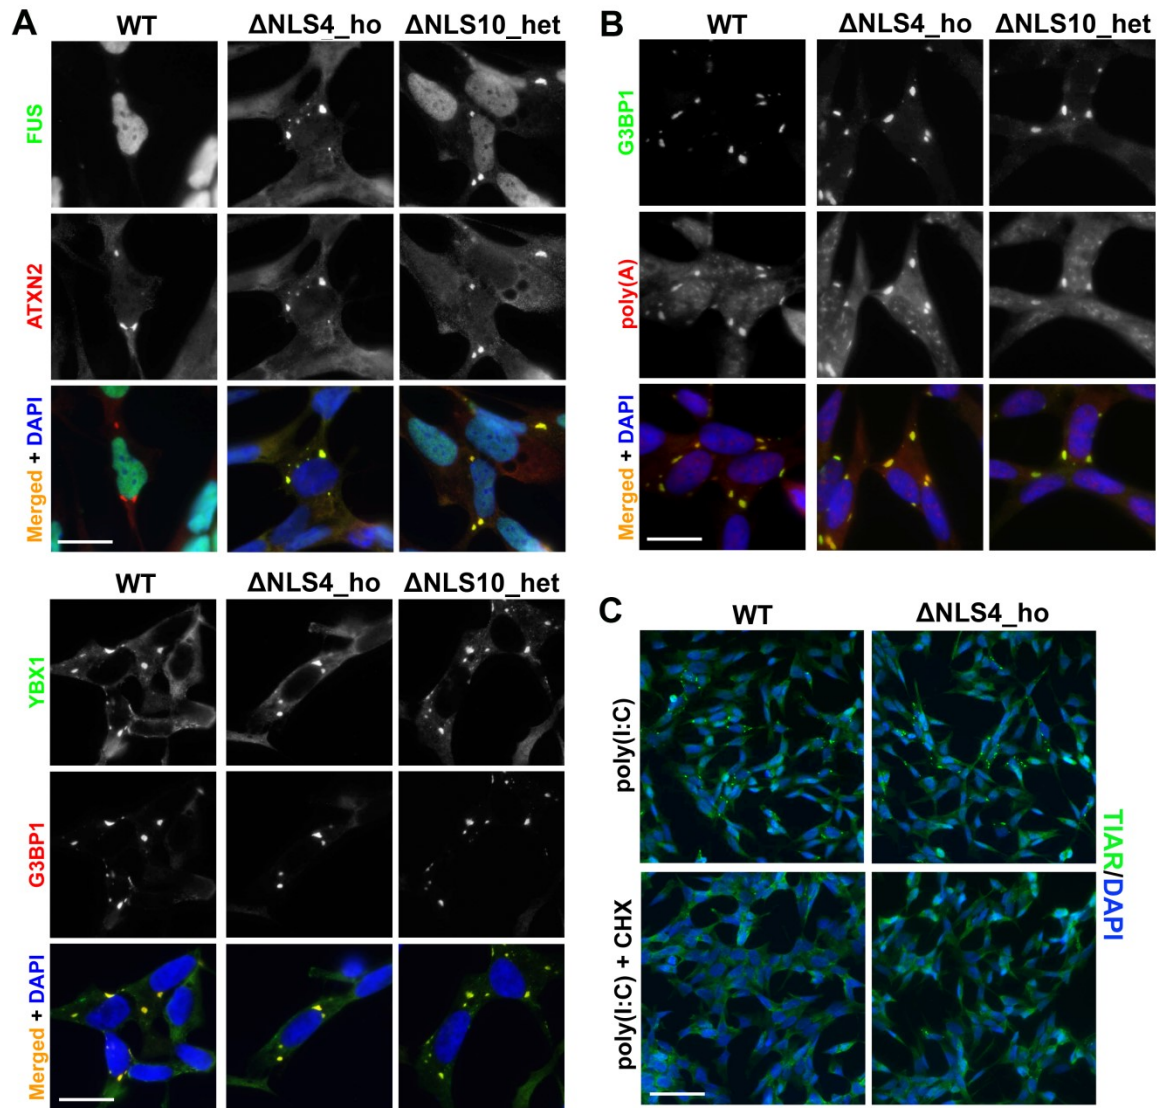

**Figure S3. Poly(I:C)-induced SGs, including those in FUS $\Delta$ NLS cells, contain SG markers ATXN2 and YBX1 (A) as well as polyadenylated RNA (B), and are sensitive to cycloheximide treatment (C), Related to Figure 2.**

Cell lines were transfected with poly(I:C) and analysed 4 h post-transfection. In C, cycloheximide (CHX) was added 1 h prior poly(I:C) transfection. Representative images are shown. Scale bar, A, B – 10  $\mu$ m, C – 50  $\mu$ m.

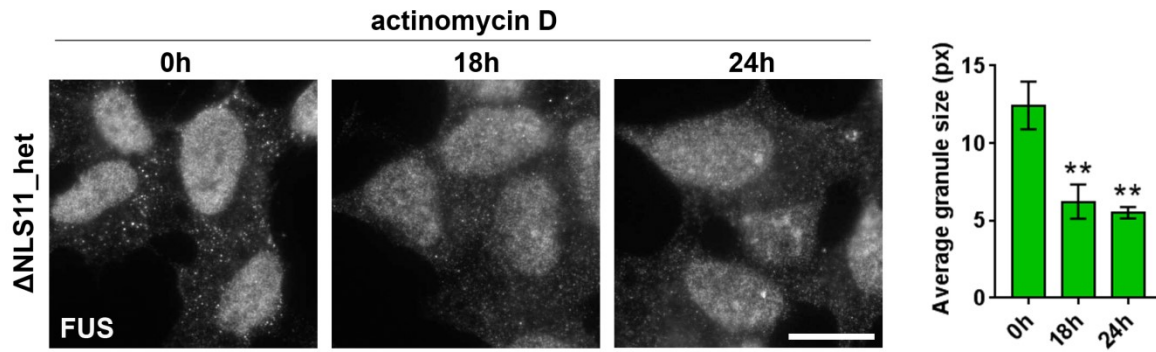

**Figure S4. Spontaneous FUS granules formed by endogenous mutant FUS protein (endoFGs) are sensitive to transcription inhibition, Related to Figure 3.**

$\Delta$ NLS11\_het line which possesses endoFGs was treated with actinomycin D for 18 h and 24 h, and the size of FGs was measured using Image J (px – pixels). Data are represented as mean $\pm$ SEM. \*\*p<0.01 (ANOVA with Dunn's test). Scale bar, 10  $\mu$ m.

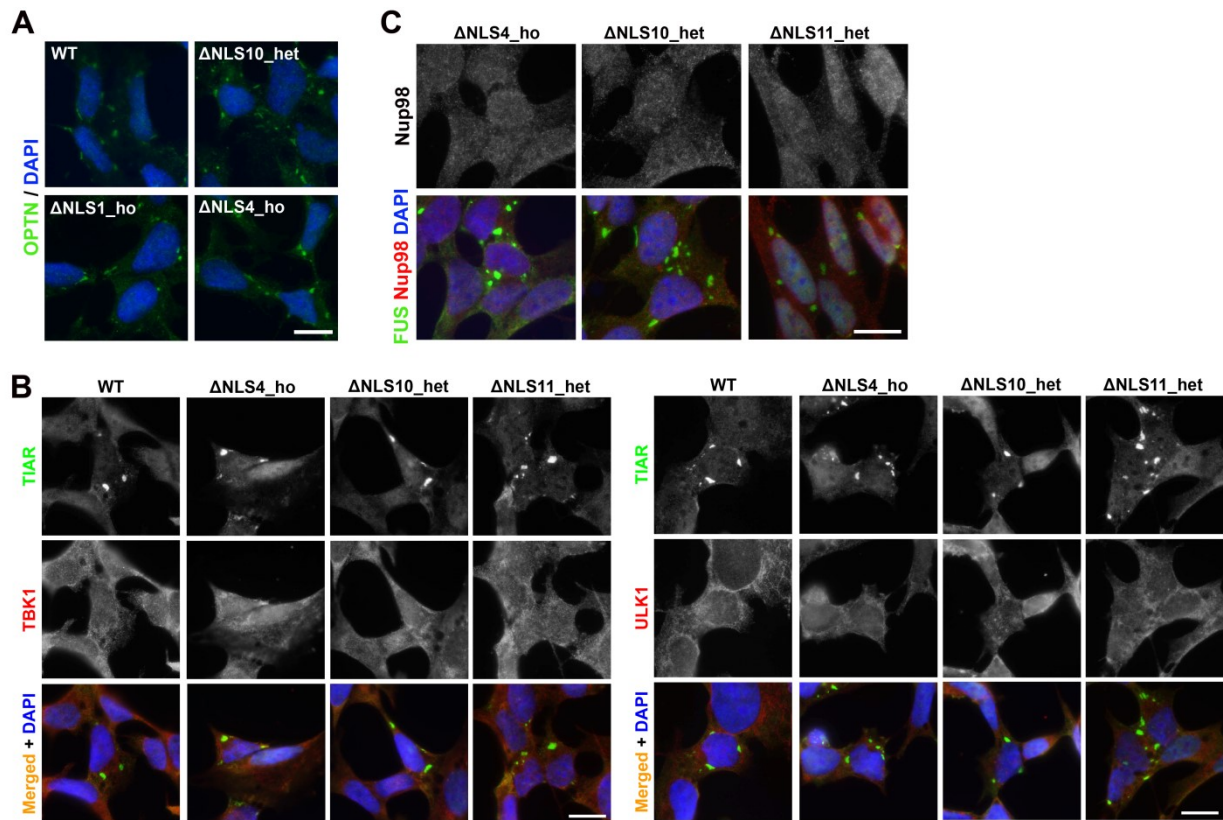

**Figure S5. Analysis of sequestration of autophagy-related proteins and NPC factors into mutant FUS assemblies, Related to Figure 4.**

(A) Optineurin is recruited into SA-induced SGs in WT and FUS $\Delta$ NLS cells. Cells were treated with SA for 1 h.

(B) Optineurin interactor TBK1 and the primary component of the autophagy initiation complex ULK1 are not detectable in mutant FUS-containing cytoplasmic assemblies in poly(I:C)-stimulated FUS $\Delta$ NLS cells.

(C) Nucleocytoplasmic transport factor Nup98 is not detected in mutant FUS-containing cytoplasmic assemblies in poly(I:C)-stimulated FUS $\Delta$ NLS cells.

In B and C, cells were analysed 6 h post-transfection; note that  $\Delta$ NLS11\_het cell line contains endoFGs and therefore forms FAs not SGs.

Scale bars, 10  $\mu$ m.



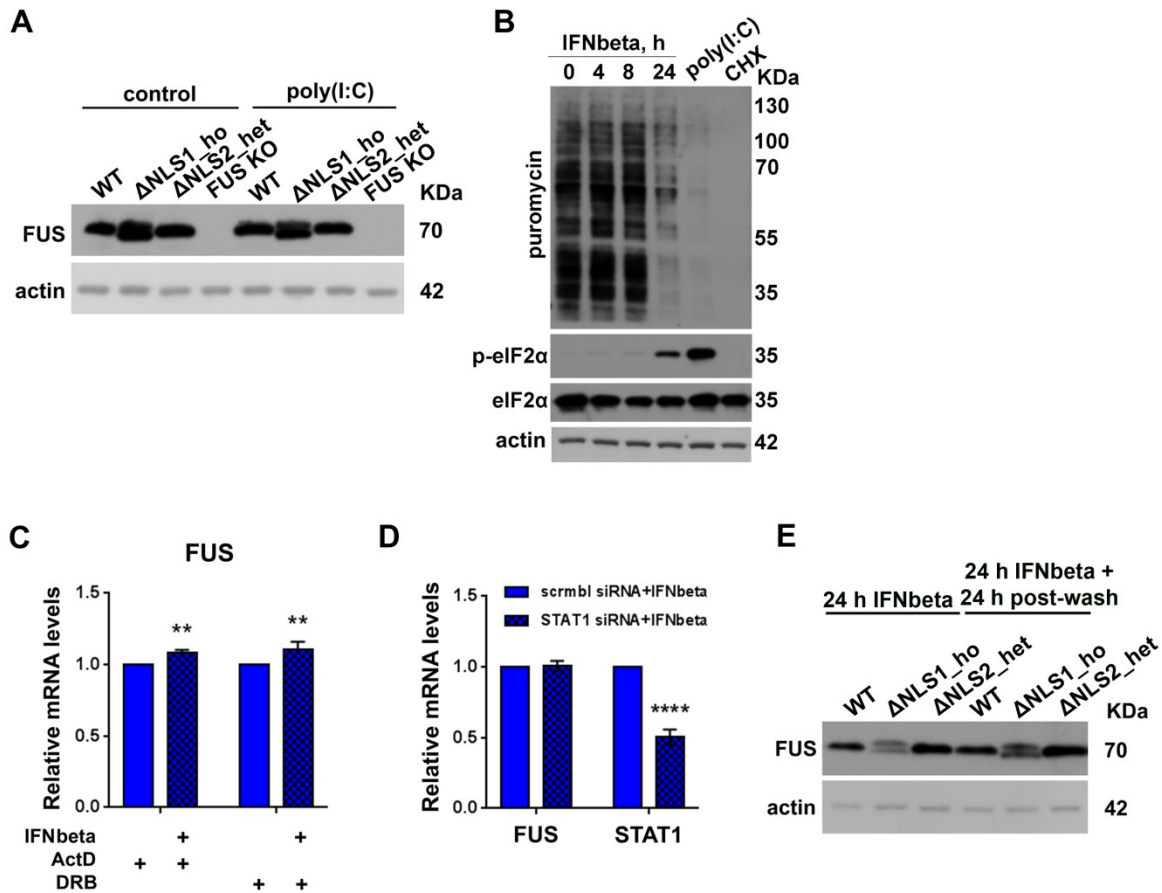

**Figure S6. IFN-beta causes accumulation of FUS protein, Related to Figure 6.**

(A) Poly(I:C) transfection does not result in increased FUS protein level in WT or FUSΔNLS cells. Cells were analysed at 24 h post-transfection.

(B) Puromycin labelling of proteins reveals significant impairment of protein translation due to eIF2α phosphorylation in poly(I:C)-transfected cells but not in IFN-beta treated cells. Cells were treated with IFN-beta and collected at the indicated time-points, or collected 8 h after poly(I:C) transfection. Cells treated with a protein synthesis inhibitor cycloheximide (CHX) were included as a negative control.

(C) Transcription inhibition does not prevent IFN-beta induced FUS mRNA accumulation. Cells were pre-treated with transcription inhibitors actinomycin D or DRB for 1 h. FUS mRNA level was measured 4 h into IFN-beta treatment by qRT-PCR. Data are represented as mean±SEM. N=4, \*\*p<0.01 (Mann-Whitney *U* test).

(D) FUS mRNA upregulation in IFN-beta treated cells is independent of STAT1. Cells were transfected with scrambled siRNA or STAT1 siRNA; 48 h post-transfection, cells were subjected to IFN-beta for 4 h, and FUS mRNA level was measured by qRT-PCR. Data are represented as mean±SEM. N=4, \*\*\*\*p<0.0001 (Mann-Whitney *U* test).

(E) FUS protein continues to accumulate after IFN-beta wash-off both in WT and FUSΔNLS cells. Cells were treated with IFN-beta for 24 h, washed and analysed after another 24 h.

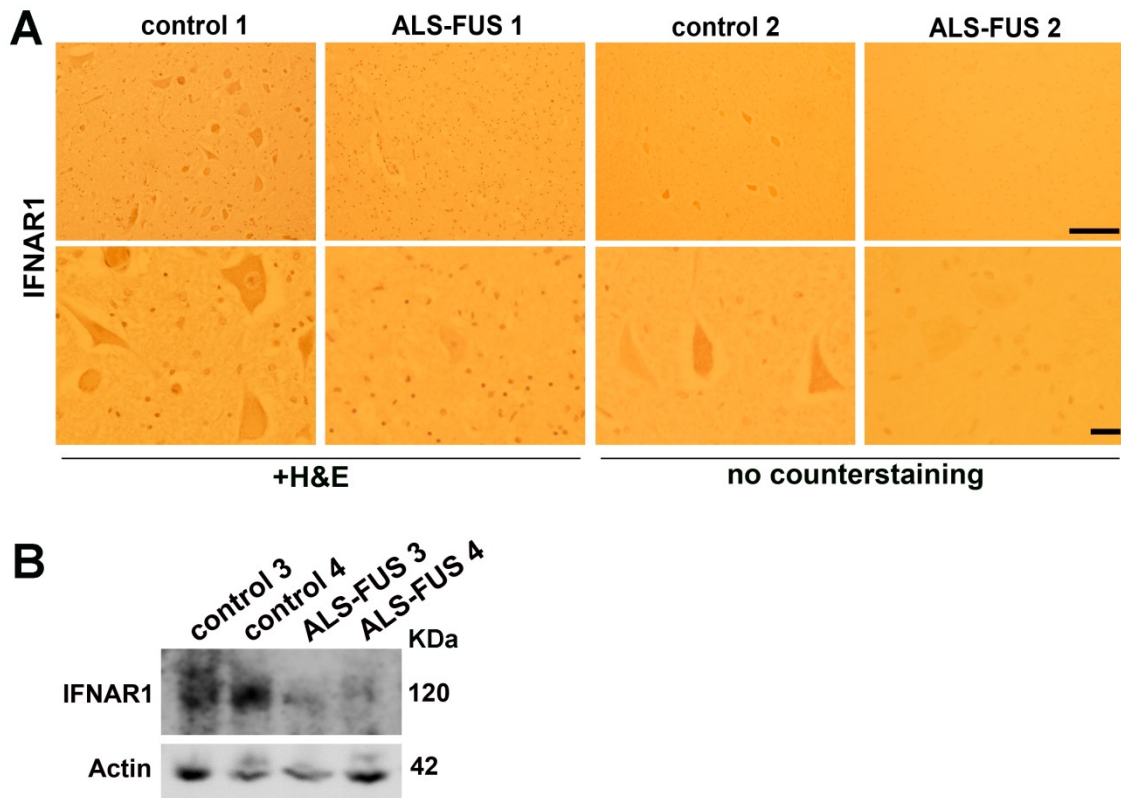

**Figure S7. IFNAR1, one of the two IFN receptor (IFNAR) subunits, is highly expressed in spinal motor neurons and is downregulated in ALS-FUS, Related to Figure 6.**

(A) IFNAR1 immunohistochemistry in the spinal cord sections for two control cases and two ALS-FUS cases. Note that control 1 and ALS-FUS 1 were counter-stained with H&E. Scale bars, 50  $\mu$ m and 10  $\mu$ m in upper and lower panels, respectively.

(B) Western blot analysis of IFNAR1 levels in the spinal cord of two control and two ALS-FUS patients.



**Table S1. Primers for qRT-PCR used in the study, Related to STAR Methods.**

| Target and primer sequence                                 | Source                     | ID  |
|------------------------------------------------------------|----------------------------|-----|
| GAPDH, forward primer: 5'-TCGCCAGCCGAGCCA-3'               | An et al., 2019            | N/A |
| GAPDH, reverse primer: 5'-GAGTTAAAAGCAGCCCTGGTG -3'        | An et al., 2019            | N/A |
| FUS, forward primer: 5'-GGA ACTCAGTCAACTCCCCA-3'           | An et al., 2019            | N/A |
| FUS, reverse primer: 5'-TACCGTAACTTCCCGAGGTG-3'            | An et al., 2019            | N/A |
| FUS ex7-, forward primer: 5'-CAGAGGTGGCATGGGGC-3'          | This paper                 | N/A |
| FUS ex7-, reverse primer: 5'-TGTAACATTCTCACCCAGGC-3'       | This paper                 | N/A |
| FUS pre-mRNA, forward primer1: 5'-GAACCACCTCCAGAAAGGGG-3'  | This paper                 | N/A |
| FUS pre-mRNA, reverse primer1: 5'-TG GGGCAAACCCATTTGGTA-3' | This paper                 | N/A |
| FUS pre-mRNA, forward primer2: 5'- GAAGCCGCGGAGAAGAGTAA-3' | This paper                 | N/A |
| FUS pre-mRNA, reverse primer2: 5'- AAGAAAAGACTTCCCGCCCC-3' | This paper                 | N/A |
| STAT1, forward primer: 5'-CTGTGCGTAGCTGCTCCTTT-3'          | This paper                 | N/A |
| STAT1, reverse primer: 5'-GGTGAACCTGCTCCAGGAAT-3'          | This paper                 | N/A |
| IFN-beta, forward primer: 5'-ACGCCGCATTGACCATCTAT-3'       | This paper                 | N/A |
| IFN-beta, reverse primer: 5'-AGCCAGGAGGTTCTCAACAA-3'       | This paper                 | N/A |
| IFIT3, forward primer: 5'-AGAGACACAGAGGGCAGTCA-3'          | This paper                 | N/A |
| IFIT3, reverse primer: 5'-AAGTTCCAGGTGAAATGGCA-3'          | This paper                 | N/A |
| CXCL10, forward primer: 5'-AAGTTCCAGGTGAAATGGCA-3'         | This paper                 | N/A |
| CXCL10, reverse primer: 5'-ATGCTGATGCAGGTACAGCG-3'         | This paper                 | N/A |
| CHOP, forward primer: 5'-TTAAAGATGAGCGGGTGGC-3'            | Shelkovnikova et al., 2017 | N/A |
| CHOP, reverse primer: 5'-GCTTTCAGGTGTGGTGATGTA-3'          | Shelkovnikova et al., 2017 | N/A |
